# Supplementary material for: Identification of JPX-RABEP1 Pair as an Immune-Related Biomarker and Therapeutic Target in Pulmonary Arterial Hypertension by Bioinformatics and Experimental Analyses
Source: MDPI journal article supplement (doi:10.3390/ijms232415559), 2022-12-08
Supplement: s1 [file s1]

Supplement S5 Primer sequences

| Primer     | Sequences               |
|------------|-------------------------|
| Gapdh-m-F  | AGGTCGGTGTGAACGGATTG    |
| Gapdh-m-R  | TGTAGACCATGTAGTTGAGGTCA |
| Jpx-m-F    | TTAGCCAGGCAGCTAGAGGA    |
| Jpx-m-R    | GGAGAAATCCGGAGTGCCAG    |
| Malat1-m-F | GGAAGTTGTTGGGGTGGGAT    |
| Malat1-m-R | GTCAAGCAAAGACACCGCAG    |
| Rabep1-m-F | CTTCGTTCTGTCGTGATGCC    |
| Rabep1-m-R | ACTGGTTGTGTTGTTGTTCGTT  |
| Ireb2-m-F  | TTCTGCCTTACTCAATACGGGT  |
| Ireb2-m-R  | AGGGCACTTCAACATTGCTCT   |
| Tank-m-F   | AGACATAGTCTGCGAAGGAACG  |
| Tank-m-R   | ATGCTCTATTGAGTTGCTCACC  |
| Tbk1-m-F   | ACTGGTGATCTCTATGCTGTCA  |
| Tbk1-m-R   | TTCTGGAAGTCCATACGCATTG  |
| Chuk-m-F   | GTCAGGACCGTGTTCTCAAGG   |
| Chuk-m-R   | GCTTCTTTGATGTTACTGAGGGC |
| Ecd-m-F    | ACACCACCAACAATCCAGCA    |
| Ecd-m-R    | ATGCTTCGACCCTTTCTGGG    |
